# Supplementary material
Source: PubMed Central journal article supplement (PMC2075171)
Supplement: tjp0581-0619-SD1.pdf [file tjp0581-0619-SD1.pdf]

# Supplemental Information

A

PV<sup>-/-</sup>

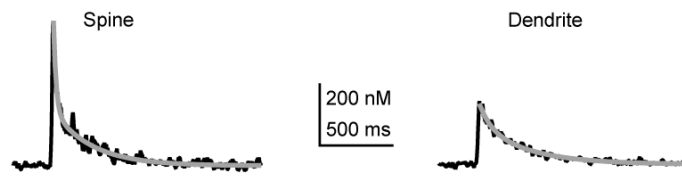

B

PV<sup>-/-</sup>

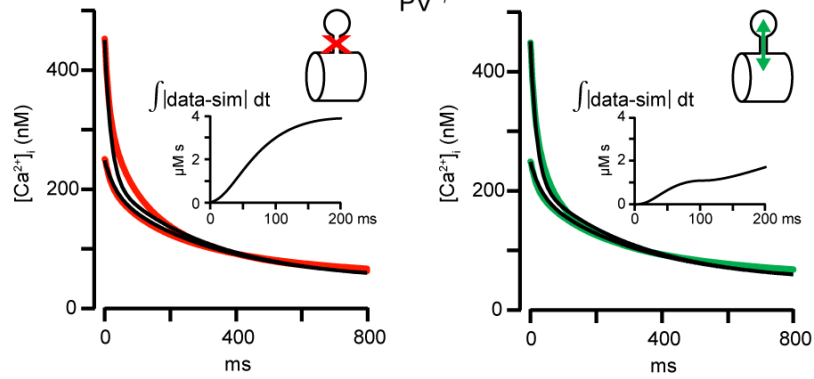

C

PV/CB<sup>-/-</sup>

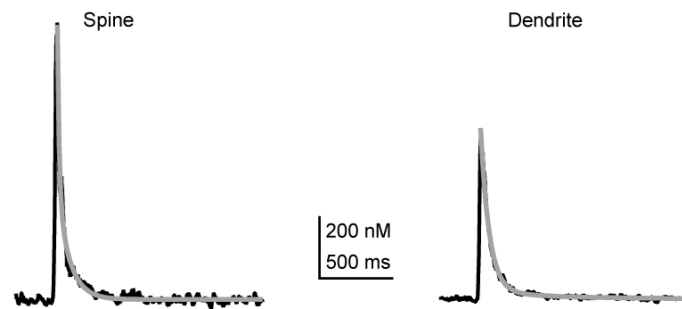

D

PV/CB<sup>-/-</sup>

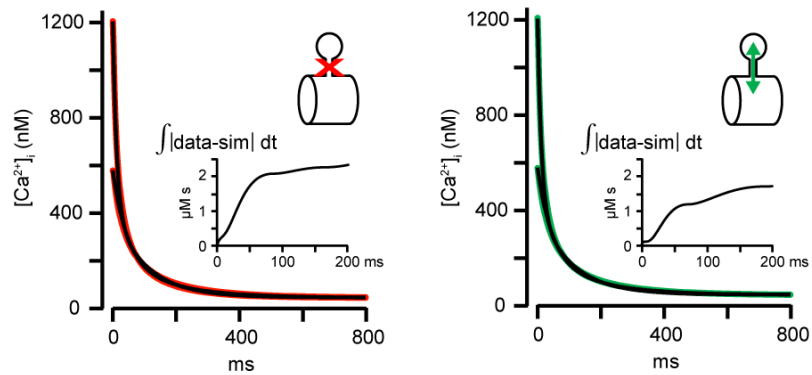

**Supp. Fig. 1. Ca<sup>2+</sup> kinetics in PV<sup>-/-</sup> and PV/CB<sup>-/-</sup> mice confirm predictions of the model**

*A*, Ca<sup>2+</sup> transients from a spine and the adjacent dendrite of a parvalbumin deficient (PV<sup>-/-</sup>) PN (black lines) recorded under conditions identical to those described in Fig. 1. The grey lines represent double exponential fits to the decays of the transients. *B*, Median decays (black lines) in spines and dendrites (large and small amplitude transient, respectively, n = 140). As in Fig. 1*D*, the coloured lines represent decays simulated with a kinetic model that excluded (red lines, *left*) or included (green lines, *right*) diffusional coupling between spine and dendrite. Parameters were kept as in the wild-type (WT), except that PV has been omitted from the simulation. The insets show the integrated differences between spines data and simulations. Note that the model failed to describe the spines decay in the absence of diffusional coupling, which is consistent with the minor contribution of PV to buffered Ca<sup>2+</sup> diffusion observed in WT. *C*, as in *A* but from a mouse line that lacked both PV and calbindin (PV/CB<sup>-/-</sup>). *D*, as in *B* but for the PV/CB<sup>-/-</sup> data (n = 134). All parameters were kept as in the PV<sup>-/-</sup> except for the removal of CB from the simulation, the altered spine morphology (Ref. 10), and an approximately two-fold increased maximum pump velocity. Note that in PV/CB<sup>-/-</sup> recordings, the contribution of buffered diffusion was strongly reduced for the following reasons: first, PV and CB, which accounted for ~40% of the transport in the wild type, were absent; second, PV/CB<sup>-/-</sup> spines show a drastically altered morphology (including longer spine necks, see Supp. Table 1); third, due to the absence of the relatively slow CaBPs CB and PV, the Ca<sup>2+</sup> transients show a rapid decay that reduces the effective time window for diffusional exchange between spine and dendrite.

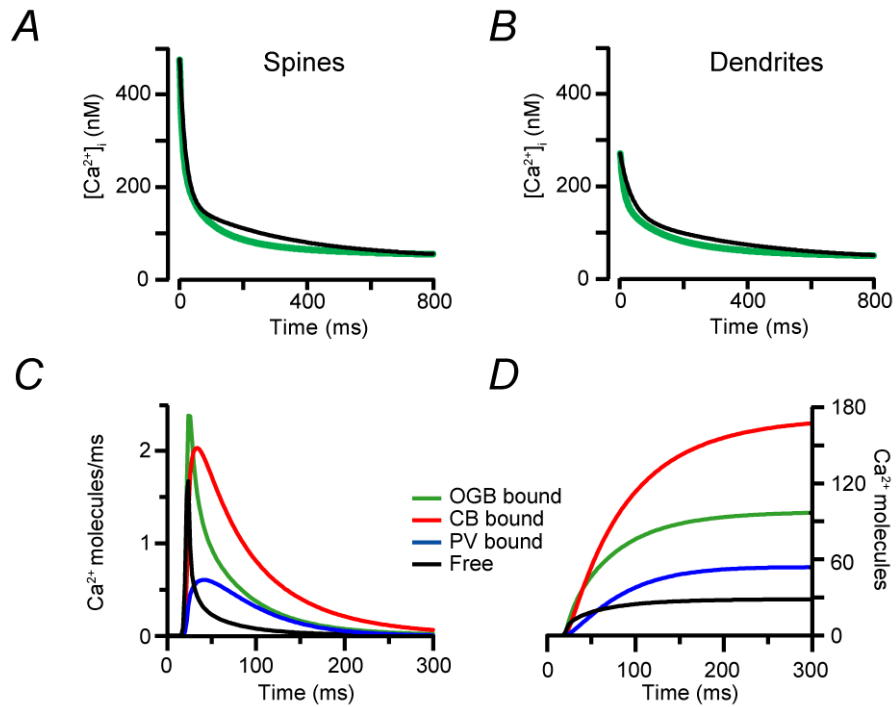

**Supp. Fig. 2. Simulation of  $\text{Ca}^{2+}$  kinetics recorded at a low indicator concentration**

*A*, Median decay kinetics in spines recorded at a dye concentration of  $\sim 40 \mu\text{M}$  (black;  $n = 40$ ). The green line represents a decay simulated with the kinetic model with diffusional coupling between spine and dendrite. All parameters but the dye concentration were kept as in the WT simulation. Note that although the overlap between fit and data is not as good as in Fig. 1 and Supp. Fig. 1, characteristic features are well reproduced: the decay is more rapid than with high dye concentration while the amplitude remained almost constant. *B*, Same as in *A* but for the dendrite. *C*, Diffusional flux of free and buffer-bound  $\text{Ca}^{2+}$  across the spine neck for the simulations in *A* and *B*. *D*, Temporal integral of the diffusion flux.

**Supplemental Methods**

**The kinetic, two-compartment model**

The  $\text{Ca}^{2+}$  current ( $I_{\text{Ca}}$ ) during the CF-mediated complex spike (Fig. 1 and 2A) and during VOCC/iGluR-mediated spine responses (Fig. 2B,C, 4B, S1 and S2) was represented by a Gaussian function adjusted to the time course of the measured complex spike.

$$I_{\text{Ca}} = I_0 10^{-\left(\frac{t-t_0}{\sigma}\right)^2} \quad (3)$$

(Note that Eqs. 1 and 2 are to be found in the main text)

$I_0$  denotes the maximal amplitude of the current which is reached at  $t_0$  and  $\sigma$  is the width of the function. The mGluR-mediated spinoous  $\text{Ca}^{2+}$  increase (Fig. 3 and 4) was represented by an alpha-function that allowed for separate adjustment of the time constants  $\tau$  of the rising and the decay phase.

$$I_{\text{Ca}} = I_0 \left( e^{-\left(\frac{t-t_0}{\tau_{\text{decay}}}\right)} - e^{-\left(\frac{t-t_0}{\tau_{\text{rise}}}\right)} \right) \quad (4)$$

The increase in  $[\text{Ca}^{2+}]_i$  caused by the  $\text{Ca}^{2+}$  influx is given by

$$\left( \frac{d[\text{Ca}^{2+}]}{dt} \right)_{\text{influx}} = \frac{A I_{\text{Ca}}}{2 F V} \quad (5)$$

where  $A$  is the surface of the spine or dendrite, respectively,  $F$  is Faraday's constant, and  $V$  the volume of the compartment.  $\text{Ca}^{2+}$  binding to OGB, CaM, CB, and PV was simulated assuming second order kinetics for all reactions. The four binding sites of CB and the two binding sites of PV were simulated as individual reaction partners, neglecting possible cooperativity. For  $\text{Ca}^{2+}$  binding to CaM only the rate-limiting binding of the first  $\text{Ca}^{2+}$  ion was considered. Under these assumptions, the rate of change in  $[\text{Ca}^{2+}]_i$  due to binding of  $\text{Ca}^{2+}$  to the  $j$ -th binding site ( $\text{BS}_j$ ) is given by

$$\left(\frac{d[\text{Ca}^{2+}]}{dt}\right)_{\text{buffer},j} = -k_{\text{on},j}[\text{Ca}^{2+}][\text{BS}_j] + k_{\text{off},j}[\text{CaBS}_j] \quad , \quad \begin{array}{l} j = 1 \text{ for OGB} \\ j = 2 - 5 \text{ for CB} \\ j = 6,7 \text{ for PV} \\ j = 8 \text{ for CaM} \end{array} \quad (6)$$

For OGB, CB, and CaM the following relationship between free ( $[\text{BS}]_j$ ) and  $\text{Ca}^{2+}$ -bound binding sites ( $[\text{CaBS}]_j$ ) applies:

$$\left(\frac{d[\text{BS}_j]}{dt}\right) = -\left(\frac{d[\text{CaBS}_j]}{dt}\right) \quad , \quad j = 1 - 5, 8 \quad (7)$$

For PV the situation is complicated by its medium affinity for  $\text{Mg}^{2+}$  which significantly affects its  $\text{Ca}^{2+}$ -binding kinetics. The change in the occupancy of PV's binding sites is given by

$$\left(\frac{d[\text{BS}_j]}{dt}\right) = -\left(\frac{d[\text{CaBS}_j]}{dt}\right) - \left(\frac{d[\text{MgBS}_j]}{dt}\right) \quad , \quad j = 6,7 \quad (8)$$

and

$$\left(\frac{d[\text{MgBS}_j]}{dt}\right) = k_{\text{on},j,\text{Mg}}[\text{Mg}^{2+}][\text{BS}_j] - k_{\text{off},j,\text{Mg}}[\text{MgBS}_j] \quad , \quad j = 6,7 \quad (9)$$

The intracellular  $\text{Mg}^{2+}$  concentration was kept constant at 590  $\mu\text{M}$ , a value calculated for our pipette solution using WinMaxC 2.1 software (<http://www.stanford.edu/~cpatton/maxc.html>).

The starting conditions were calculated from chemical equilibrium at  $[\text{Ca}^{2+}]_{\text{rest}}$  of 45 nM. A single surface-based  $\text{Ca}^{2+}$  extrusion mechanism was simulated assuming Michaelis-Menten kinetics (1):

$$\left(\frac{d[\text{Ca}^{2+}]}{dt}\right)_{\text{pump}} = -v_{\text{max}} \frac{A}{V} \left( \frac{[\text{Ca}^{2+}]}{[\text{Ca}^{2+}] + K_M} \right) \quad (10)$$

where  $K_M$  is the Michaelis-Menten constant and  $v_{\text{max}}$  the maximal pump velocity. In order to establish the resting  $[\text{Ca}^{2+}]_i$ , the  $\text{Ca}^{2+}$  clearance was balanced by a leak current:

$$\left( \frac{d[\text{Ca}^{2+}]}{dt} \right)_{\text{leak}} = v_{\text{max}} \frac{A}{V} \left( \frac{[\text{Ca}^{2+}]_{\text{rest}}}{[\text{Ca}^{2+}]_{\text{rest}} + K_M} \right) \quad (11)$$

For a given molecular species X, the diffusional current  $J_X$  across the spine neck was simulated as

$$J_X = D_X \frac{\pi r_{\text{neck}}^2}{l_{\text{neck}}} (C_{X,\text{spine}} - C_{X,\text{dendrite}}) \quad (12)$$

where  $D_X$  and  $C_X$  are the diffusion coefficient and the concentration of the diffusing species, respectively, and  $r_{\text{neck}}$  and  $l_{\text{neck}}$  are the radius and the length of the spine neck. The rate of change in the concentration of X due to diffusion follows as

$$\left( \frac{d[X]}{dt} \right)_{\text{diffusion}} = - \frac{J_X}{V_{\text{spine}}} \quad (13a)$$

for the spine and

$$\left( \frac{d[X]}{dt} \right)_{\text{diffusion}} = \frac{J_X}{V_{\text{dendrite}}} \quad (13b)$$

for the dendrite. The simulation included independent diffusion of the free binding sites of OGB, CB, PV, and CaM, of the corresponding  $\text{Ca}^{2+}$ -bound binding sites, of the  $\text{Mg}^{2+}$ -bound binding sites of PV, and of free  $\text{Ca}^{2+}$ . The time course of the total change in  $[\text{Ca}^{2+}]_i$  is given by the sum of Eqs. 5 - 11 in the absence of diffusion. Diffusional coupling was implemented by adding Eqs. 12 and 13a or b.

**Supplemental Table 1. Values and Parameters of the Simulation**

| Parameter                                       | Value                                     | Notes                     |
|-------------------------------------------------|-------------------------------------------|---------------------------|
| $[\text{Ca}^{2+}]_{\text{rest}}$                | 45 nM                                     | ref. (2)                  |
| $[\text{Mg}^{2+}]_i$                            | 590 $\mu\text{M}$                         | calculated, held constant |
| Total $\text{Ca}^{2+}$ influx                   |                                           |                           |
| CF signal                                       |                                           |                           |
| Spine                                           | ~ 4,700 ions                              |                           |
| Dendrite                                        | ~ 35,000 ions                             |                           |
| VOCC/iGluR-mediated signal                      |                                           |                           |
| Spine                                           | ~ 4,700 ions                              |                           |
| mGluR-mediated signal                           |                                           |                           |
| Spine                                           | ~ 54,000 ions                             |                           |
| Extrusion                                       |                                           |                           |
| Michaelis-Menten constant, $K_M$                | 3 $\mu\text{M}$                           |                           |
| Maximal pump velocity, $v_{\text{max}}$         | 30-300 $\text{pmol cm}^{-2}\text{s}^{-1}$ |                           |
| Oregon Green BAPTA-1                            |                                           |                           |
| Effective concentration                         | 160 or 40 $\mu\text{M}$                   | 80% of pipette conc.      |
| $K_D$                                           | 325 nM                                    | ref. (3)                  |
| $k_{\text{off}}$                                | 140 $\text{s}^{-1}$                       | ref. (4) and <sup>a</sup> |
| $k_{\text{on}}$                                 | 430 $\mu\text{M}^{-1}\text{s}^{-1}$       | calculated                |
| Calbindin D <sub>28k</sub>                      |                                           |                           |
| Effective concentration                         | 100 $\mu\text{M}$                         | ref. (5) and <sup>b</sup> |
| After correction for wash-out                   | 50 $\mu\text{M}$                          | <sup>c</sup>              |
| Binding sites (non-cooperative)                 | 4                                         | ref. (6)                  |
| Ratio of high- to medium-affinity binding sites | 2:2                                       | ditto                     |
| $k_{\text{off, medium aff.}}$                   | 35.8 $\text{s}^{-1}$                      | ditto                     |
| $k_{\text{off, high aff.}}$                     | 2.6 $\text{s}^{-1}$                       | ditto                     |
| $k_{\text{on, medium aff.}}$                    | 43.5 $\mu\text{M}^{-1}\text{s}^{-1}$      | ditto and <sup>d</sup>    |
| $k_{\text{on, high aff.}}$                      | 5.5 $\mu\text{M}^{-1}\text{s}^{-1}$       | ditto                     |
| $K_D$ , medium aff.                             | 822 nM                                    | calculated                |
| $K_D$ , high aff.                               | 474 nM                                    | calculated                |
| Parvalbumin                                     |                                           |                           |
| Effective concentration                         | 75 $\mu\text{M}$                          | ref. (5)                  |
| After correction for wash-out                   | 40 $\mu\text{M}$                          | <sup>c</sup>              |
| Binding sites (non-cooperative)                 | 2                                         | ref. (7)                  |
| $k_{\text{off,Ca}}$                             | 0.95 $\text{s}^{-1}$                      | ref. (8)                  |
| $k_{\text{off,Mg}}$                             | 25 $\text{s}^{-1}$                        | ditto                     |
| $K_D$ ,Ca                                       | 9 nM                                      | ditto                     |
| $K_D$ ,Mg                                       | 31 $\mu\text{M}$                          | ref. (7)                  |
| $k_{\text{on,Ca}}$                              | 107 $\mu\text{M}^{-1}\text{s}^{-1}$       | calculated                |
| $k_{\text{on,Mg}}$                              | 0.8 $\mu\text{M}^{-1}\text{s}^{-1}$       | calculated                |

**Supplemental Table 1, continued**

| Parameter                             | Value                              | Notes                         |
|---------------------------------------|------------------------------------|-------------------------------|
| <b>Calmodulin</b>                     |                                    |                               |
| Effective concentration               | 10 $\mu\text{M}$                   | estimated from ref. (3)       |
| Binding sites                         | 1                                  |                               |
| $k_{\text{off}}$                      | 2,200 $\text{s}^{-1}$              | <sup>e</sup>                  |
| $K_{\text{D}}$                        | 55 $\mu\text{M}$                   | ditto                         |
| $k_{\text{on}}$                       | 40 $\mu\text{M}^{-1}\text{s}^{-1}$ | ditto                         |
| <b>Geometry</b>                       |                                    |                               |
| <b>Wild type and PV<sup>-/-</sup></b> |                                    |                               |
| Volume of spine head                  | 0.083 $\mu\text{m}^3$              | ref. (9)                      |
| Surface area of spine head            | 0.9 $\mu\text{m}^2$                | ditto                         |
| Radius of spine neck                  | 0.09 $\mu\text{m}$                 | ditto                         |
| Length of spine neck                  | 0.66 $\mu\text{m}$                 | ditto                         |
| Spine density                         | 3.4 $\mu\text{m}^{-1}$             | ref. (10)                     |
| Radius of dendritic segment           | 1 $\mu\text{m}$                    |                               |
| Length of dendritic segment           | 0.3 $\mu\text{m}$                  | calculated from spine density |
| <b>PV/CB<sup>-/-</sup></b>            |                                    |                               |
| Volume of spine head                  | 0.2 $\mu\text{m}^3$                | estimated <sup>f</sup>        |
| Surface area of spine head            | 1.8 $\mu\text{m}^2$                | ditto                         |
| Radius of spine neck                  | 0.1 $\mu\text{m}$                  | ditto                         |
| Length of spine neck                  | 1.3 $\mu\text{m}$                  | ditto                         |
| Spine density                         | 5 $\mu\text{m}^{-1}$               | ref. (10)                     |
| Radius of dendritic segment           | 1 $\mu\text{m}$                    |                               |
| Length of dendritic segment           | 0.2 $\mu\text{m}$                  | calculated from spine density |
| <b>Diffusional mobility</b>           |                                    |                               |
| $D_{\text{Ca}}$                       | 223 $\mu\text{m}^2\text{s}^{-1}$   | ref. (11)                     |
| $D_{\text{OGB}}$                      | 15 $\mu\text{m}^2\text{s}^{-1}$    | ref. (12) and <sup>a</sup>    |
| $D_{\text{PV}}$                       | 43 $\mu\text{m}^2\text{s}^{-1}$    | ref. (13)                     |
| $D_{\text{CB}}$                       | 20 $\mu\text{m}^2\text{s}^{-1}$    | ref. (14)                     |
| $D_{\text{CaM}}$                      | 21 $\mu\text{m}^2\text{s}^{-1}$    | this study                    |
| Fraction of immobile CB               | 0.2                                | ref. (14)                     |
| Fraction of immobile CaM              | 0.2                                | this study                    |

<sup>a</sup> Data for Calcium Green 1, an indicator dye closely related to OGB; <sup>b</sup> assuming that 33% of CB is occupied by  $\text{Mg}^{2+}$ ; <sup>c</sup> assuming a ~50% washout during our whole-cell recordings; <sup>d</sup> assuming two-fold slower kinetics in the cytosol compared to the *in vitro* data (15); <sup>e</sup> Faas *et al.* (2004), Soc. Neurosci. Abstr. No 165.5; <sup>f</sup> calculated from the wild-type EM data based on the observation of a ~2 fold increase in volume, surface, and length in spines of PV/CB<sup>-/-</sup> mice (10).



1. Sala, F. & Hernández-Cruz, A. (1990) *Biophys. J.* **57**, 313-324.
2. Airaksinen, M. S., Eilers, J., Garaschuk, O., Thoenen, H., Konnerth, A. & Meyer, M. (1997) *Proc. Natl. Acad. Sci. USA* **94**, 1488-1493.
3. Schmidt, H., Stiefel, K., Racay, P., Schwaller, B. & Eilers, J. (2003) *J. Physiol. (London)* **551**, 13-32.
4. Eberhard, M. & Erne, P. (1991) *Biochem. Biophys. Res. Commun.* **180**, 209-215.
5. Kosaka, T., Kosaka, K., Nakayama, T., Hunziker, W. & Heizmann, C. W. (1993) *Exp. Brain Res.* **93**, 483-491.
6. Nägerl, U. V., Novo, D., Mody, I. & Vergara, J. L. (2000) *Biophys. J.* **79**, 3009-3018.
7. Eberhard, M. & Erne, P. (1994) *Eur. J. Biochem.* **222**, 21-26.
8. Lee, S.-H., Schwaller, B. & Neher, E. (2000) *J. Physiol. (Lond.)* **525**, 419-432.
9. Harris, K. M. & Stevens, J. K. (1988) *J. Neurosci.* **8**, 4455-4469.
10. Vecellio, M., Schwaller, B., Meyer, M., Hunziker, W. & Celio, M. R. (2000) *Eur. J. Neurosci.* **12**, 945-954.
11. Allbritton, N. L., Meyer, T. & Stryer, L. (1992) *Science* **258**, 1812-1815.
12. Holthoff, K., Tsay, D. & Yuste, R. (2002) *Neuron* **33**, 425-437.
13. Schmidt, H., Brown, E. B., Schwaller, B. & Eilers, J. (2003) *Biophys. J.* **84**, 2599-2608.
14. Schmidt, H., Schwaller, B. & Eilers, J. (2005) *Proc. Natl. Acad. Sci. USA* **102**, 5850-5855.
15. Berggård, T., Miron, S., Önnarfjord, P., Thulin, E., Åkerfeldt, K. S., Enghild, J. J., Akke, M. & Linse, S. (2002) *J. Biol. Chem.* **277**, 16662-72.
