# Supplementary material
Source: PubMed Central journal article supplement (PMC2075171)

**A**PV<sup>-/-</sup>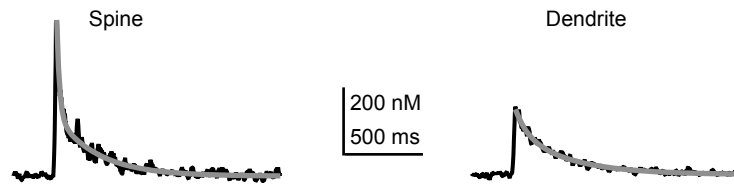**B**PV<sup>-/-</sup>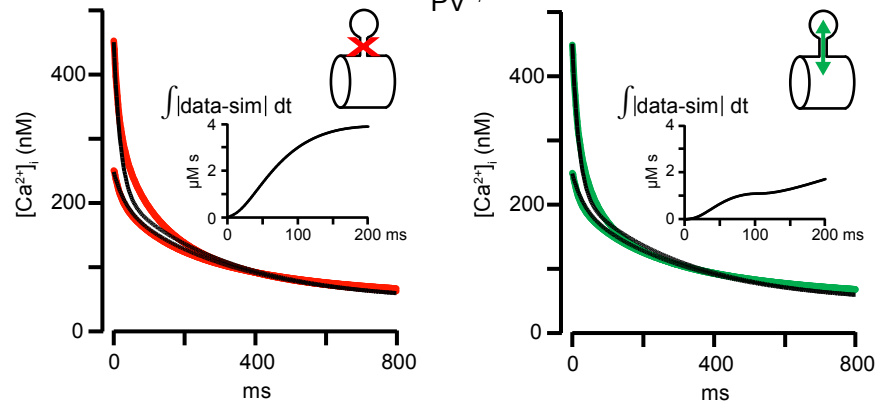**C**PV/CB<sup>-/-</sup>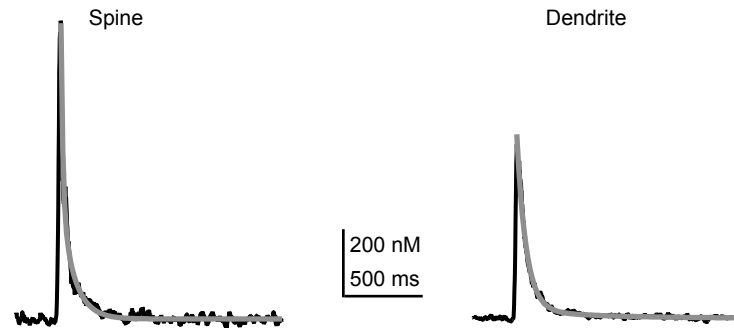**D**PV/CB<sup>-/-</sup>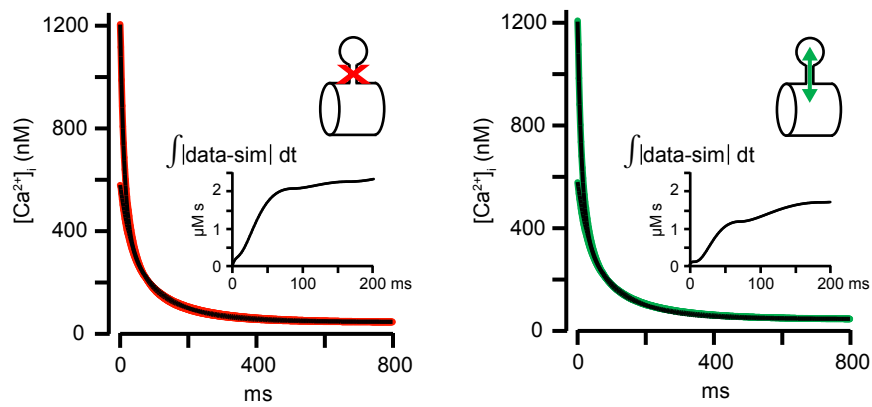Supplemental figure 1, Schmidt *et al.*

Supplement: jphysiol_2007.127860_1.pdf [file jphysiol_2007.127860_1.pdf]

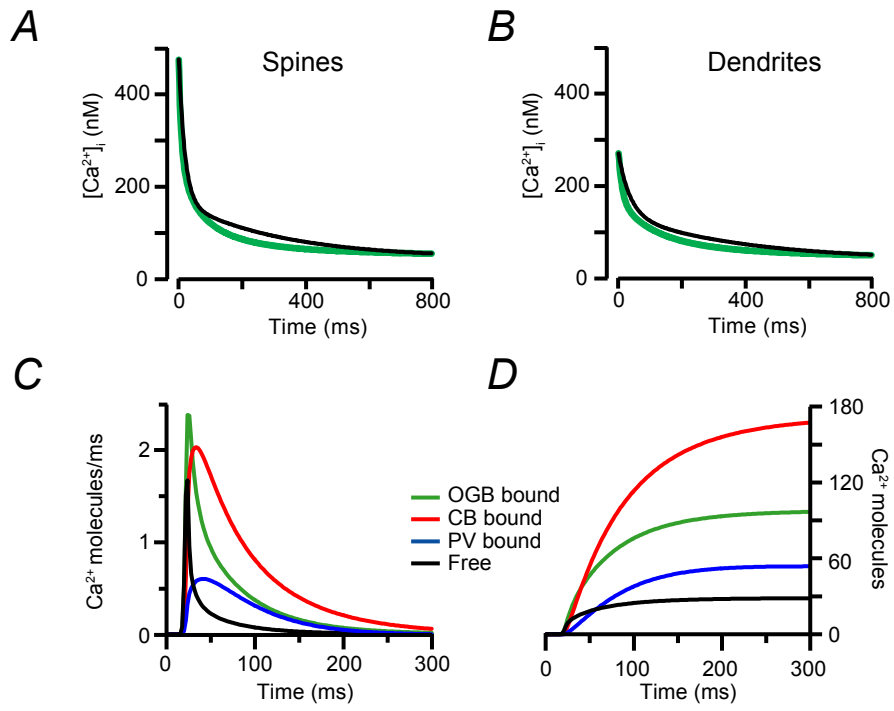

Supplemental figure 2, Schmidt *et al.*

Supplement: jphysiol_2007.127860_2.pdf [file jphysiol_2007.127860_2.pdf]
